# Supplementary material for: Solvent-assisted dispersive micro-solid phase extraction of bisphenols using iron(iii) thenoyltrifluoroacetonate complex (Fe(TTA)3) as a new nanostructured sorbent: a proof of concept
Source: Royal Society of Chemistry journal article supplement (doi:10.1039/d3ay00214d), 2023-01-01
Supplement: d3ay00214d1.pdf [file d3ay00214d1.pdf]

Electronic Supplementary Information to

**Solvent-assisted dispersive solid phase extraction of bisphenols using iron (III)**

**thenoyltrifluoroacetate complex (Fe(TTA)<sub>3</sub>) as new nanostructured sorbent: A proof of concept**

5 Celestine Vubangsi Gemuh<sup>1</sup>, Aleš Bezrouk<sup>2</sup>, Rocío Pérez<sup>3</sup>, Caitlan Ayala<sup>3</sup>, Petr Solich<sup>1</sup>, Burkhard Horstkotte<sup>1,\*</sup>

<sup>1</sup> Department of Analytical Chemistry, Faculty of Pharmacy in Hradec Králové, Charles University, Akademika Heyrovského 1203, 500 05 Hradec Králové

<sup>2</sup> Department of Medical Biophysics, Faculty of Medicine in Hradec Králové, Charles University, 10 Šimkova 870, Hradec Kralove, 500 03

<sup>3</sup> Chemistry Department, Louisiana State University, Baton Rouge, LA, 70803.

\*Corresponding Author Contact Information:

Burkhard Horstkotte, Department of Analytical Chemistry, Faculty of Pharmacy, Charles University, 15 Akademika Heyrovského 1203/8, 500 05 Hradec Králové, Czech Republic

Tel.: +420 495 067 183

E-mail: horstkob@faf.cuni.cz

Content:

20 ESI-1: Representative chromatograms

ESI -2: UV/VIS absorption spectra of Fe(TTA)<sub>3</sub> complex

ESI -3: Study of Fe(TTA)<sub>3</sub> complex stability at different pH values

ESI -4: FT-IR spectra of 2-thenoyltrifluoroacetone

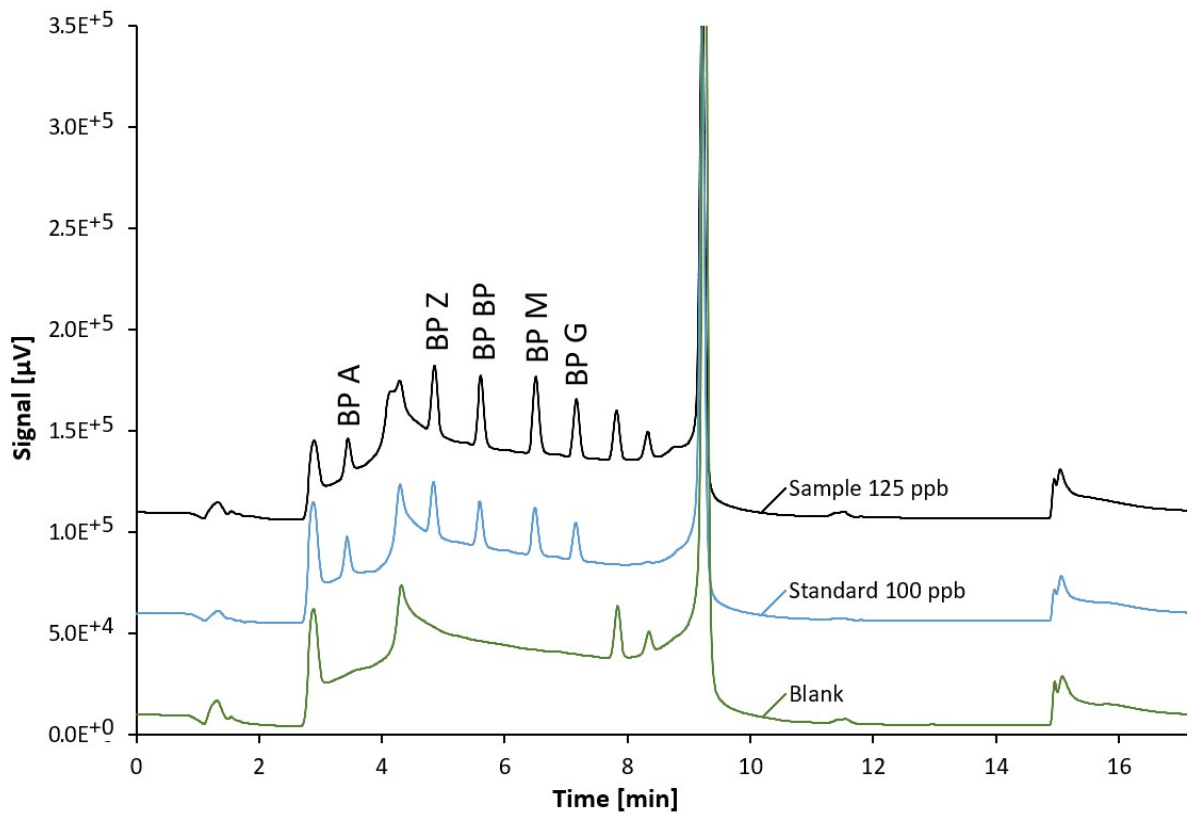

ESI-1: Representative chromatograms from MeOH extracts originating from  $\text{Fe}(\text{TTA})_3$ -d $\mu$ SPE of blank WWTP effluent sample, 100 ppb mixed standard, and sample spiked at  $125 \mu\text{g L}^{-1}$  concentration level. Conditions: flow rate of 1 mL/min, injection volume of 20  $\mu\text{L}$ , mobile phase A: water, B: acetonitrile, 30 gradient elution, wavelength 230 nm, run time of 17.01 min. Peaks at 3 min, 4.5 min, and 8.7 min are related to the sorbent (partially complexed  $\text{Fe}^{3+}$ , pure TTA, and complex, respectively).

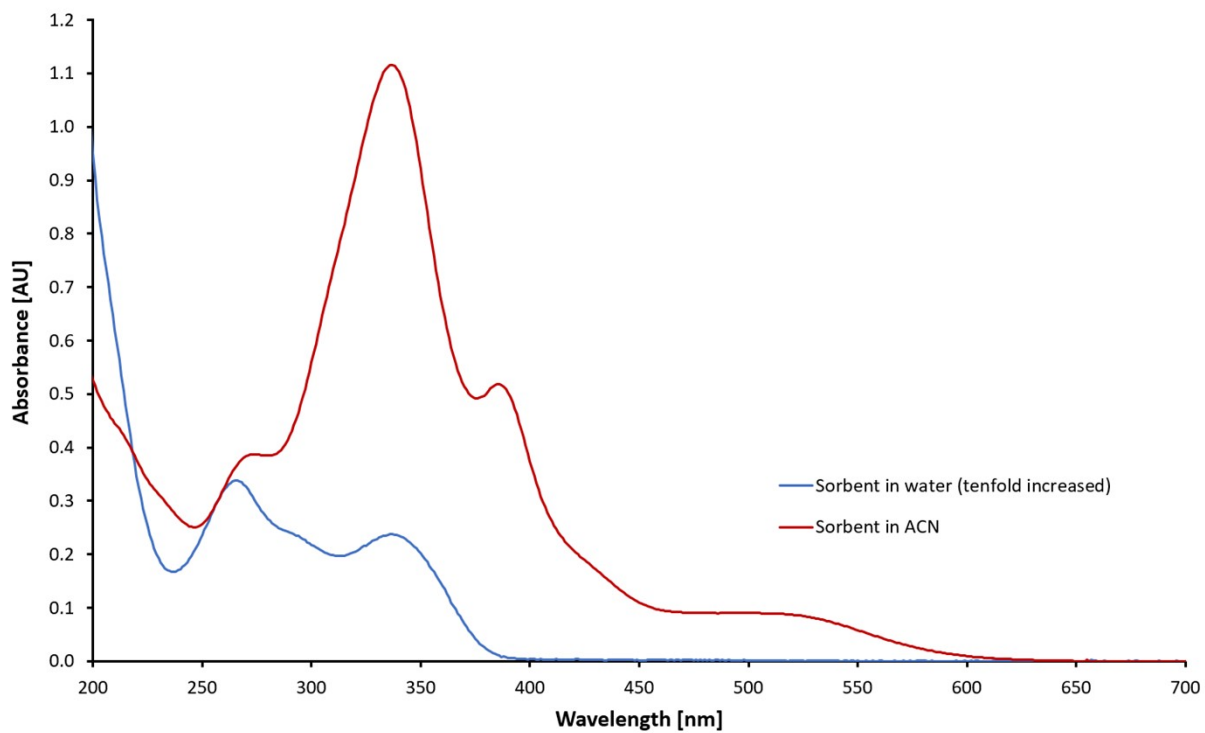

ESI-2: UV/VIS absorption spectra of Fe(TTA)<sub>3</sub> complex dissolved in acetonitrile at 15.5 mg L<sup>-1</sup> (red) and 35 distilled water, saturated with Fe(TTA)<sub>3</sub>, tenfold increase (blue).

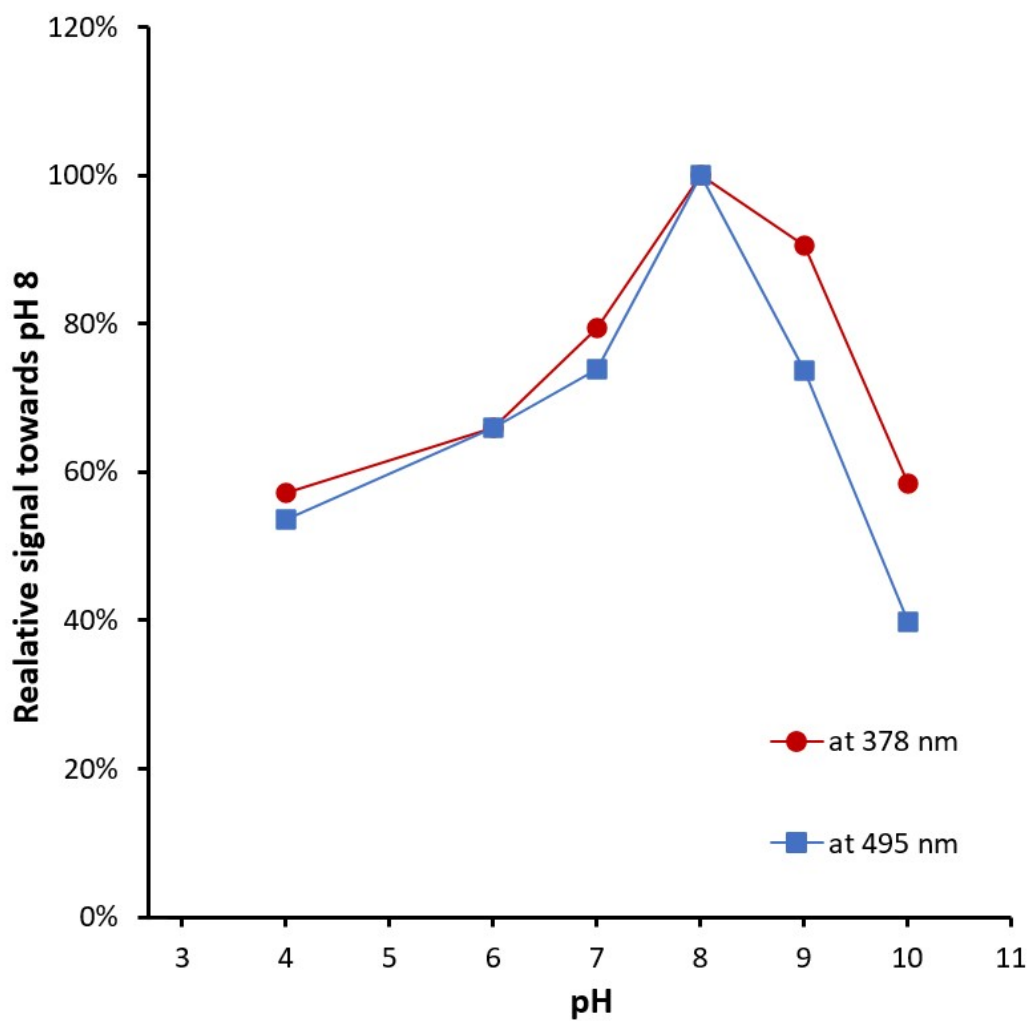

ESI-3: Study of  $\text{Fe}(\text{TTA})_3$  complex stability at different pH values as described in section 3.1. Where  $15 \text{ mg L}^{-1}$  of  $\text{Fe}(\text{TTA})_3$  was prepared in saturated octanol and equal volume of buffer solutions of pH 4, 6, 7, 8, 9, 10 was added and stirred for 10 mins and the octanol phase recovered and measured with UV/VIS spectrophotometer.

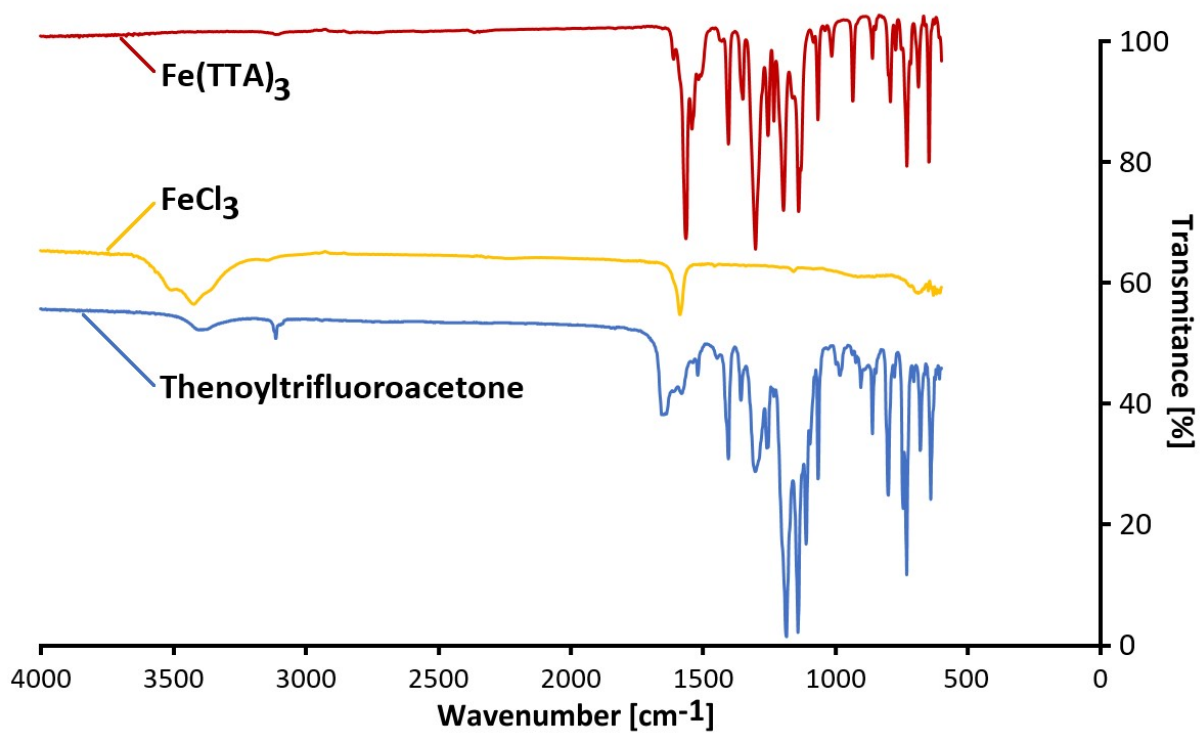

ESI-4: FT-IR spectra of 2-thenoyltrifluoroacetone represented by blue line, FeCl<sub>3</sub> by yellow line and  
45 Fe(TTA)<sub>3</sub> by red line measured in ATR mode.
